# Supplementary material
Source: ML conference proceedings conference paper supplement (https://proceedings.neurips.cc/paper_files/paper/2018/hash/1f36c15d6a3d18d52e8d493bc8187cb9-Abstract.html)
Supplement: Supplementary file [file 1f36c15d6a3d18d52e8d493bc8187cb9-Supplemental.zip]

---

# Unsupervised Learning of Object Landmarks through Conditional Image Generation

## Supplementary Material

---

Tomas Jakab<sup>1\*</sup>   Ankush Gupta<sup>1\*</sup>   Hakan Bilen<sup>2</sup>   Andrea Vedaldi<sup>1</sup>

<sup>1</sup> Visual Geometry Group  
University of Oxford  
{tomj, ankush, vedaldi}@robots.ox.ac.uk

<sup>2</sup> School of Informatics  
University of Edinburgh  
hbilen@ed.ac.uk

## Appendix

We first present more detailed results on MAFL dataset comparing performance of different versions of our method. Then we show extended versions of figures presented in the paper. The sections are organized by the datasets used.

### 1 MAFL

| Training set → |                | CelebA      |      |          | VoxCeleb |
|----------------|----------------|-------------|------|----------|----------|
| $K$ landmarks  | Regression set | Thewlis [3] | sup. | selfsup. | sup.     |
| 10             | MAFL           | 7.95        | 3.32 | 3.19     | —        |
| 30             |                | 7.15        | 2.63 | 2.58     | 4.17     |
| 50             |                | 6.67        | 2.59 | 2.54     | 3.59     |
| 10             | CelebA         | 6.32        | 3.32 | 3.19     | —        |
| 30             |                | 5.76        | 2.63 | 2.57     | 4.14     |
| 50             |                | 5.33        | 2.59 | 2.53     | 3.55     |

Table 1: **Results on MAFL face-landmarks test-set.** Varying number ( $K$ ) of unsupervised landmarks are learnt on two training-sets — random-TPS warps on CelebA [1], and face-videos from the VoxCeleb [2]. These landmarks are regressed onto 5 manually-annotated landmarks in the MAFL [4] test set, using either CelebA or MAFL training sets. Mean squared-error (MSE) normalised by the inter-ocular distance is reported.

### 2 Boundary Discounting

When TPS warping is used during training some pixels in the resulting image may lie outside the original image. Since reconstructing these empty pixels is irrelevant we ignore them in the reconstruction loss. We additionally ignore 10 pixels on the edges of the original image and use a smooth step over the next 20 pixels. This is to further discourage reconstruction of the empty pixels as they can influence the perceptual loss when a convolutional neural network with a large receptive field is used.

---

\*equal contribution.

### 3 MAFL and AFLW Faces

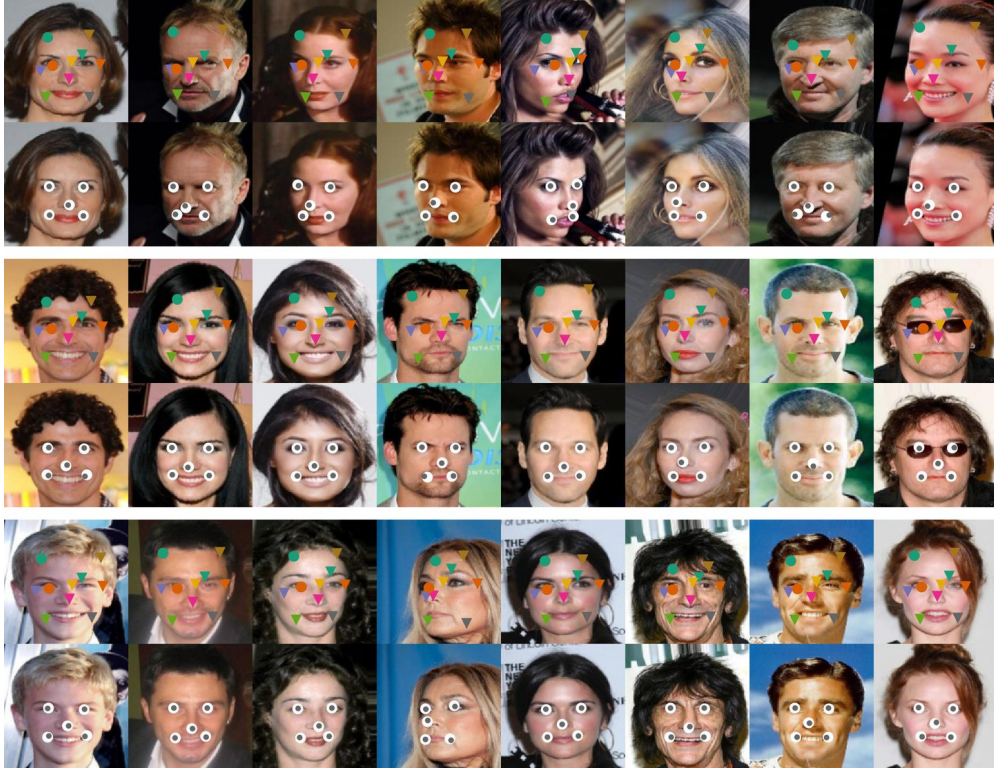

Figure 1: Supervised linear regression of 5 keypoints (bottom rows) from 10 unsupervised (top rows) on MAFL (above) and AFLW (below) test sets. Centre of the white-dots correspond to the ground-truth location, while the dark ones are the predictions. The models were trained on random-TPS warped image-pairs; self-supervised perceptual-loss network was used.

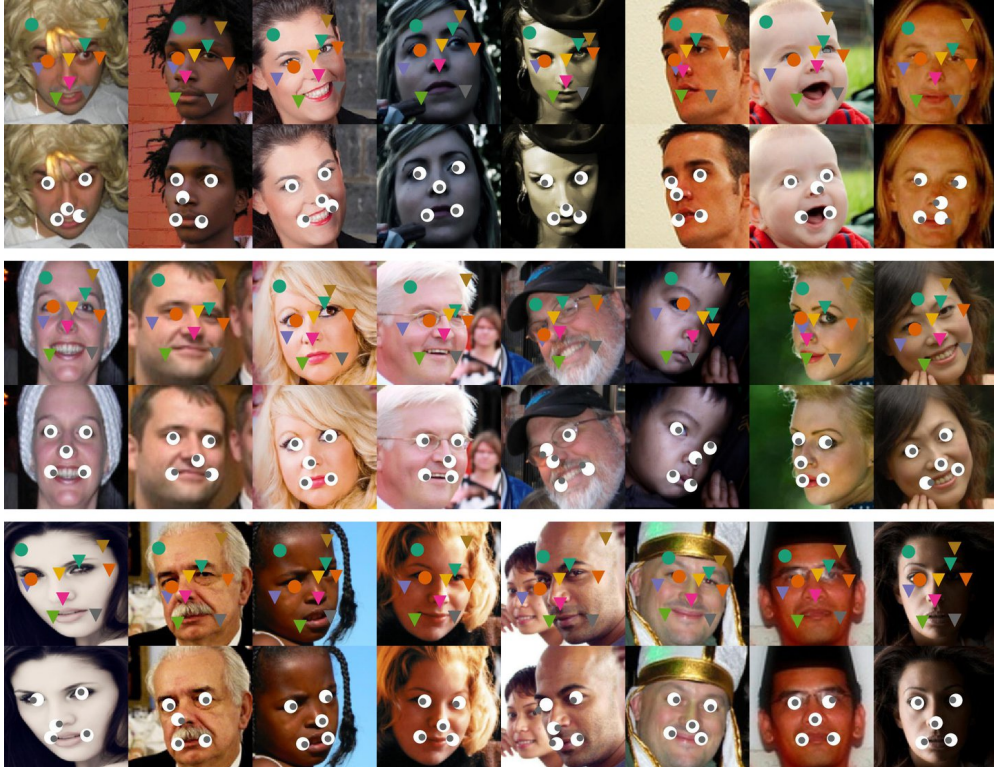



## 4 VoxCeleb

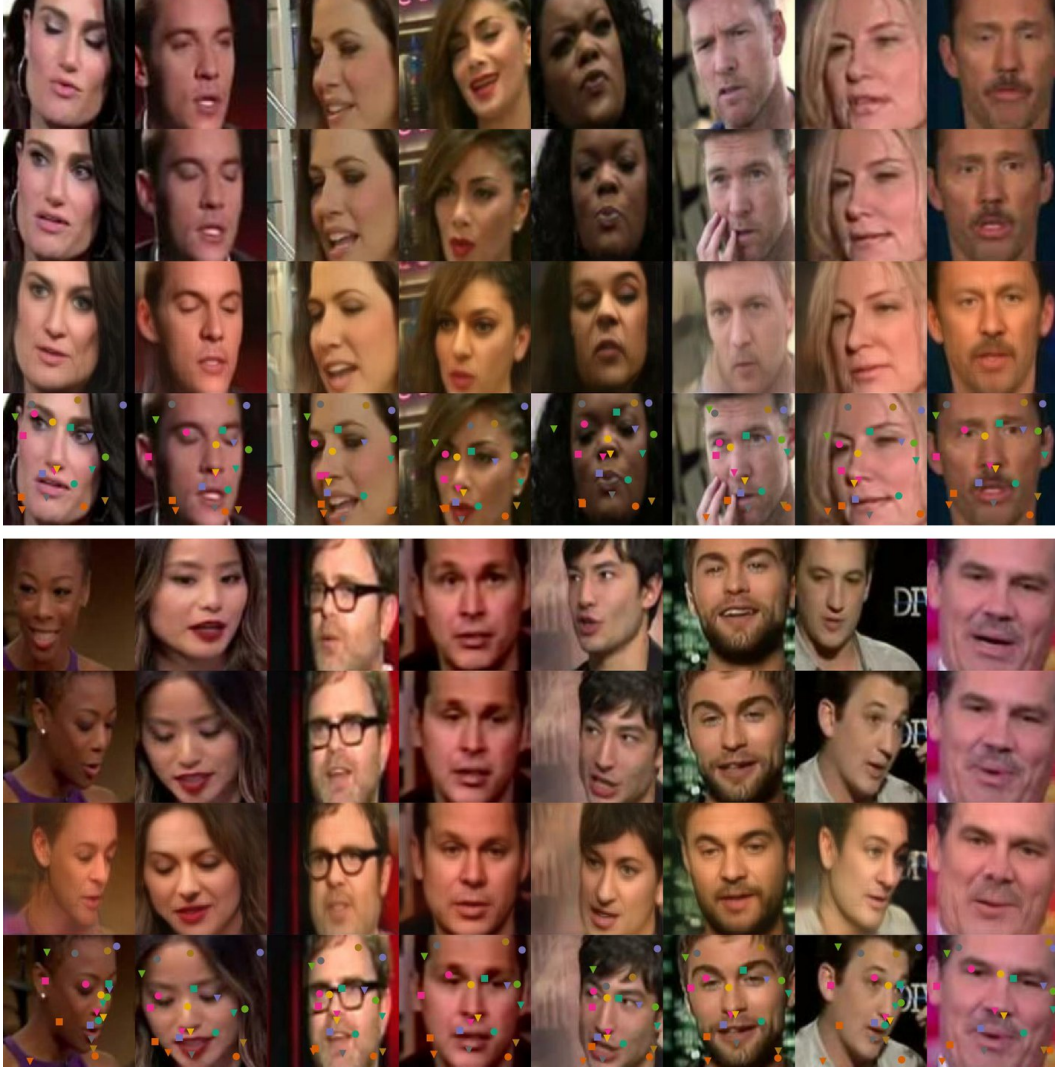

Figure 2: Training with video frames from VoxCeleb. **[rows top-bottom]:** (1) source image  $\mathbf{x}$ , (2) target image  $\mathbf{x}'$ , (3) generated target image  $\Psi(\mathbf{x}, \Phi(\mathbf{x}'))$ , (4) unsupervised landmarks  $\Phi(\mathbf{x}')$  superimposed on the target image. The landmarks consistently track facial features.

## 5 BBCPose

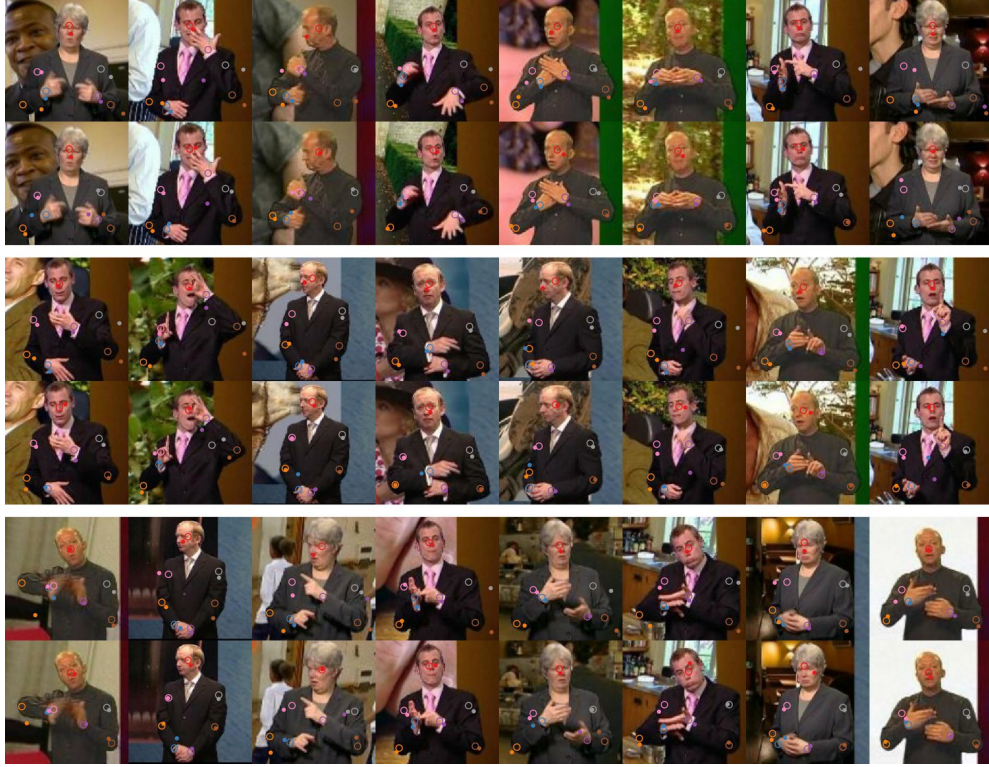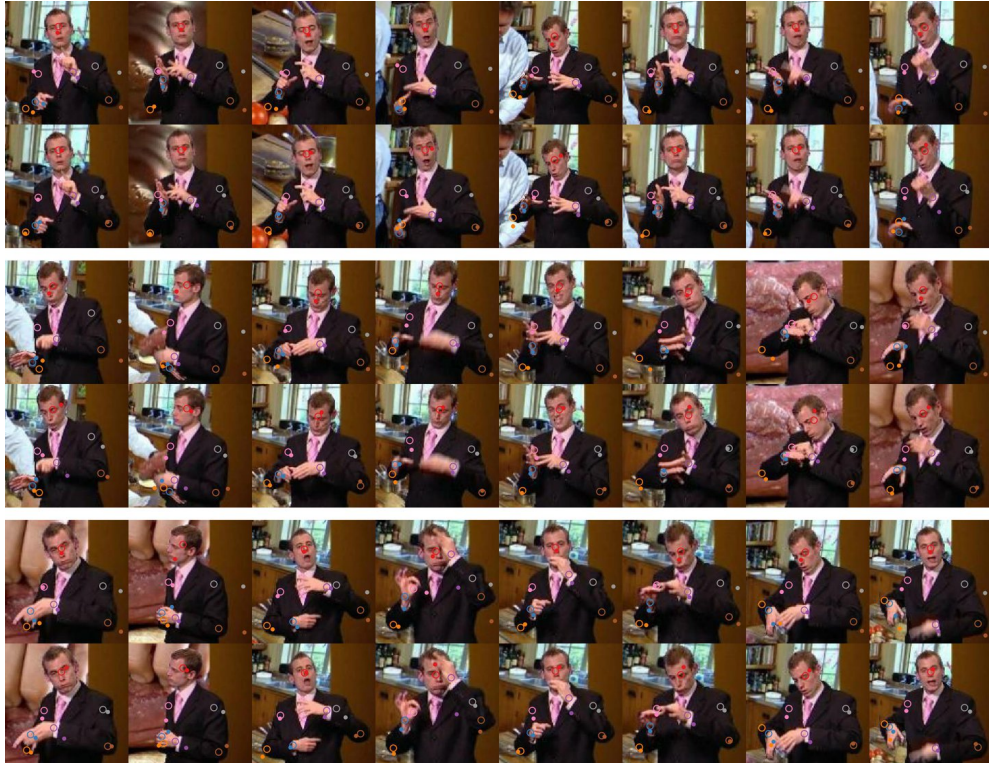



## 6 Human3.6M

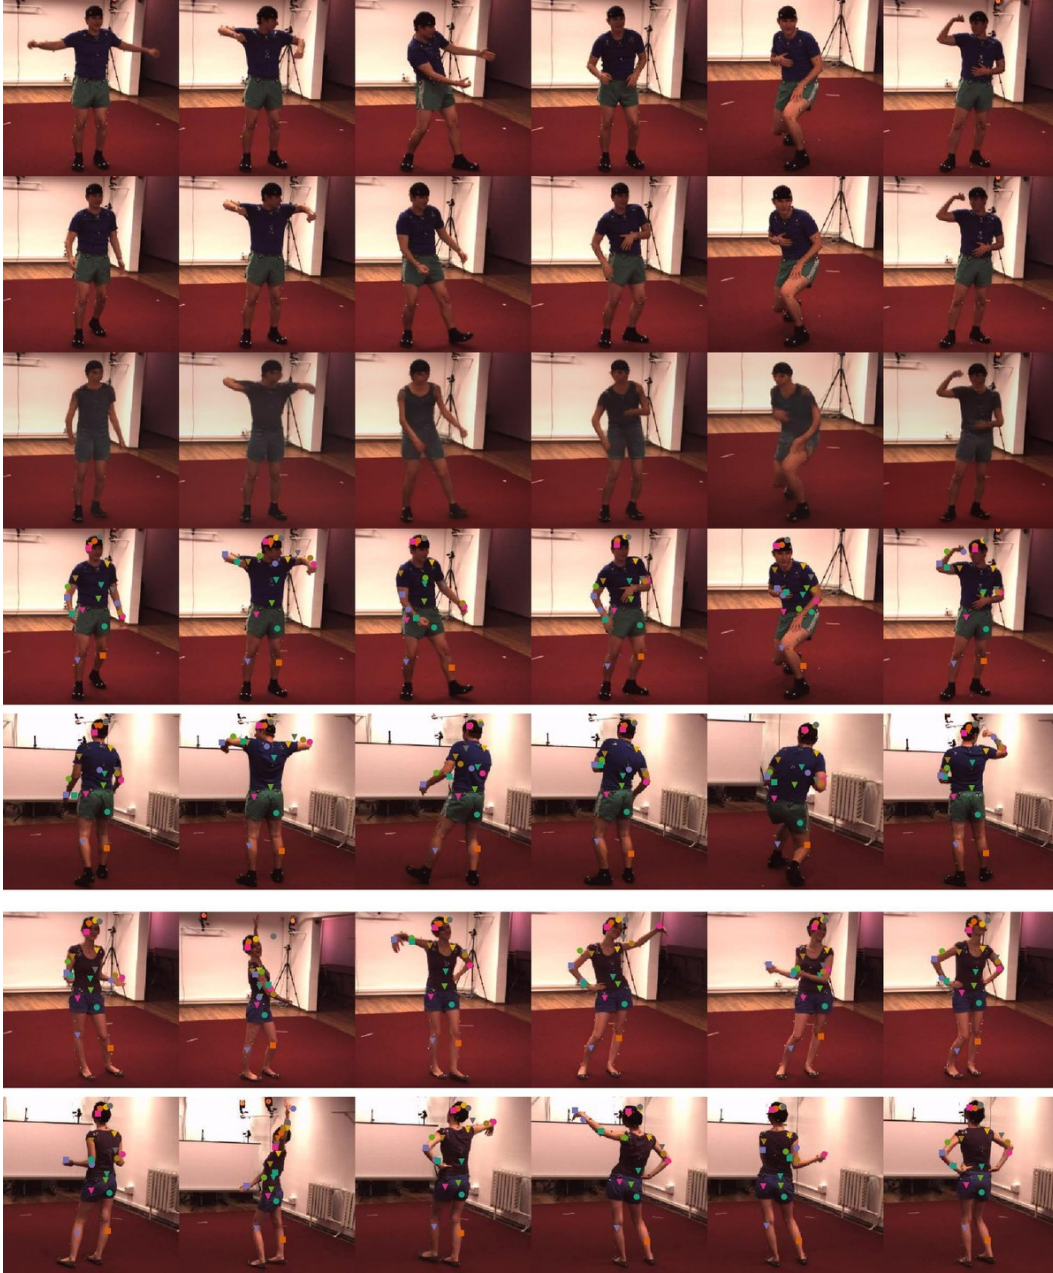

Figure 4: **Unsupervised Landmarks on Human3.6M.** Video of two actors (S1, S11) “posing”, from the Human3.6M test set. (rows) (1) source, (2) target, (3) generated, (4) landmarks, (5) landmarks on frames from a different view, (6–7) landmarks on two views of the second actor. The landmarks consistently track the legs, arms, torso and head across frames, views and actors. However, the model confounds the frontal and dorsal sides.

## 7 smallNORB 3D Objects: pose, shape, and illumination invariance

Object-category specific keypoint detectors are trained on the 5 categories in the smallNORB dataset — *human*, *car*, *animal*, *airplane*, and *truck*. Training is performed on pairs of images, which differ only in their viewpoints, but have the same object instance (or shape), and illumination.

Keypoints invariant to viewpoint, illumination, and object shape are visualised for object instances in the test set. The training set consists of only 5 object instances per category, yet the detectors generalise to novel object instances in the test set, and correspond to structurally similar regions across instances.

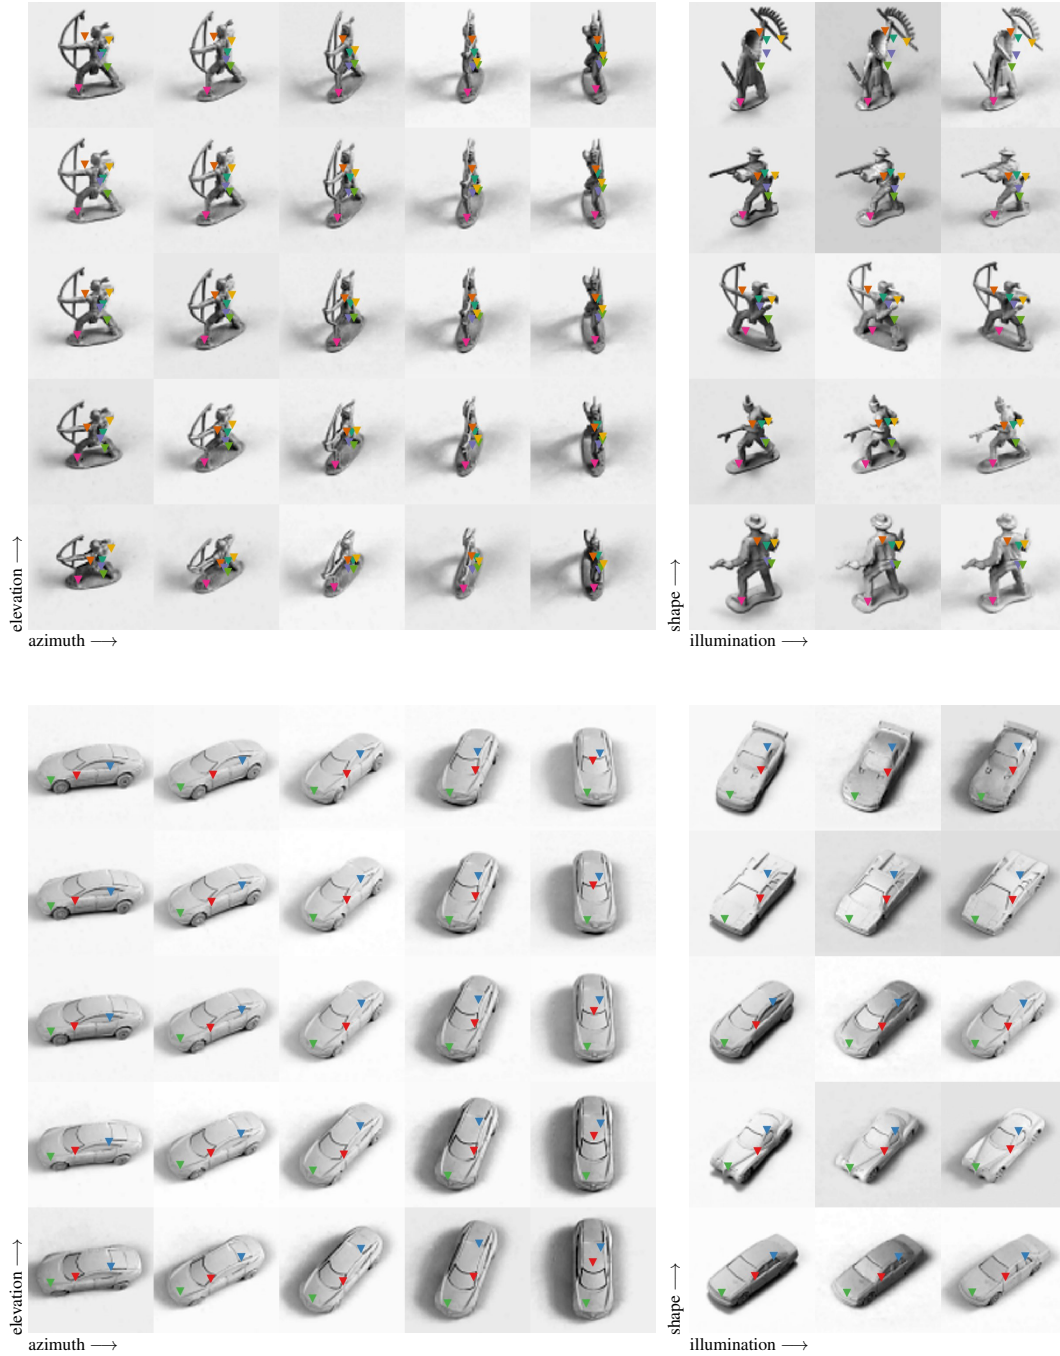

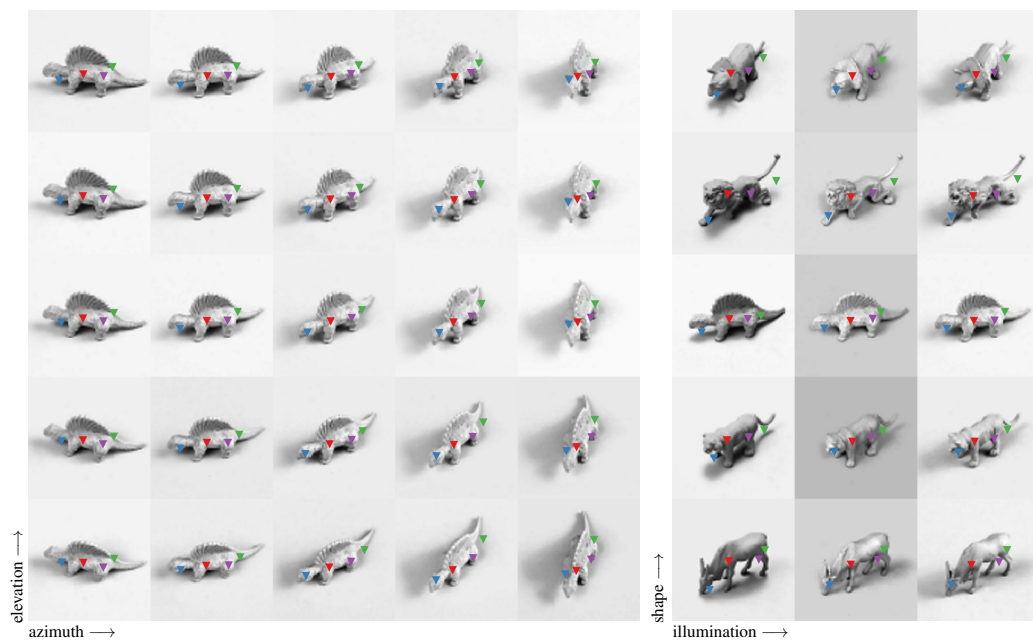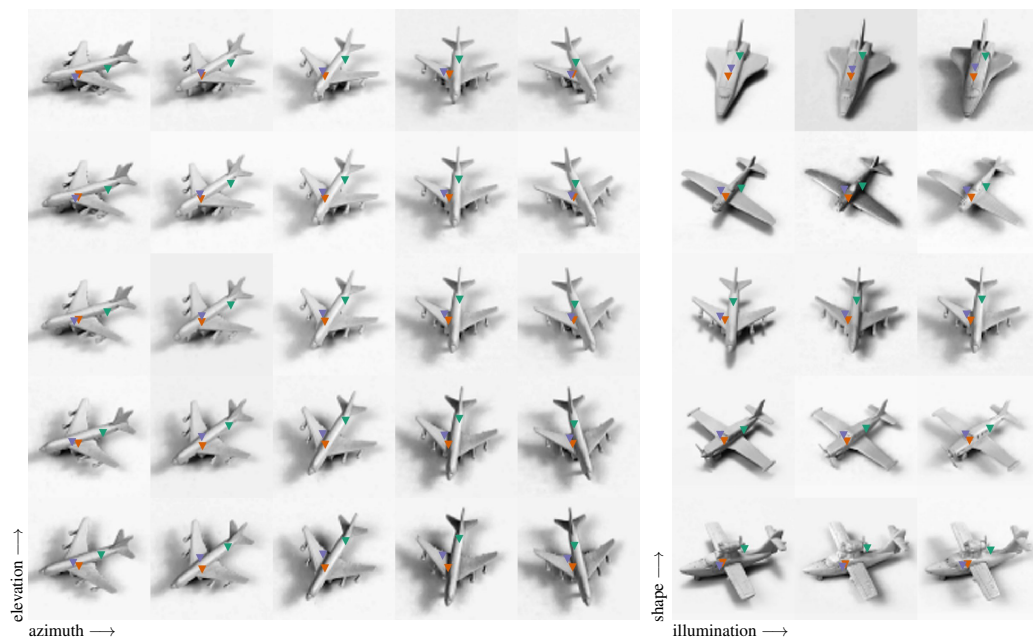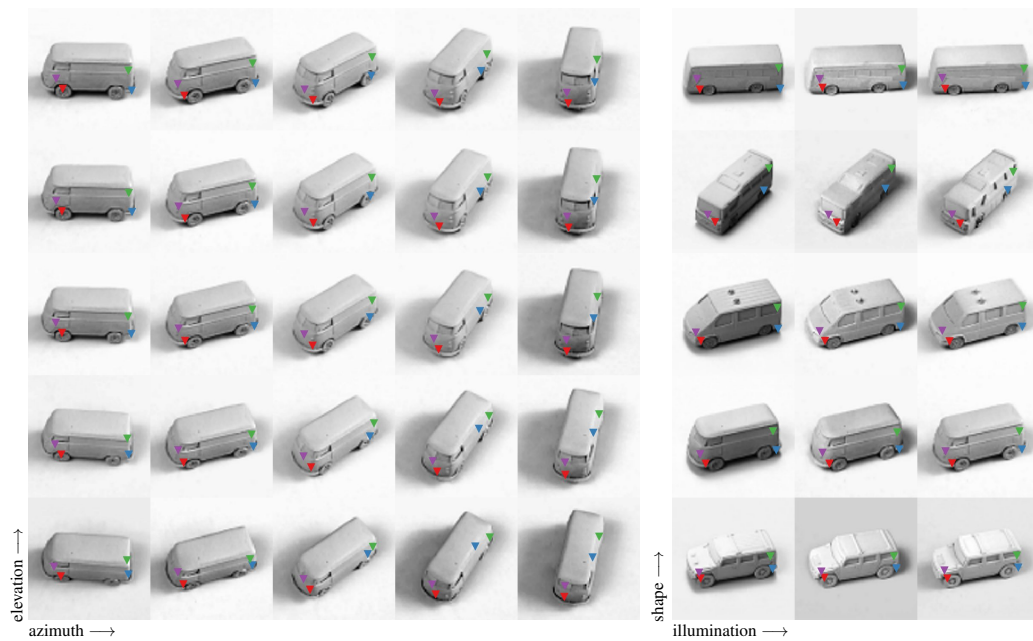



## 8 Disentangling appearance and geometry

The generator substitutes the appearance of the target image ( $\mathbf{x}'$ ) with that of the source image ( $\mathbf{x}$ ). Instead of sampling image pairs  $(\mathbf{x}, \mathbf{x}')$  with *consistent* style, as done during training, we sample pairs with *different* styles at inference, resulting in compelling transfer across different object categories — SVHN digits, Human3.6M humans, and AFLW faces.

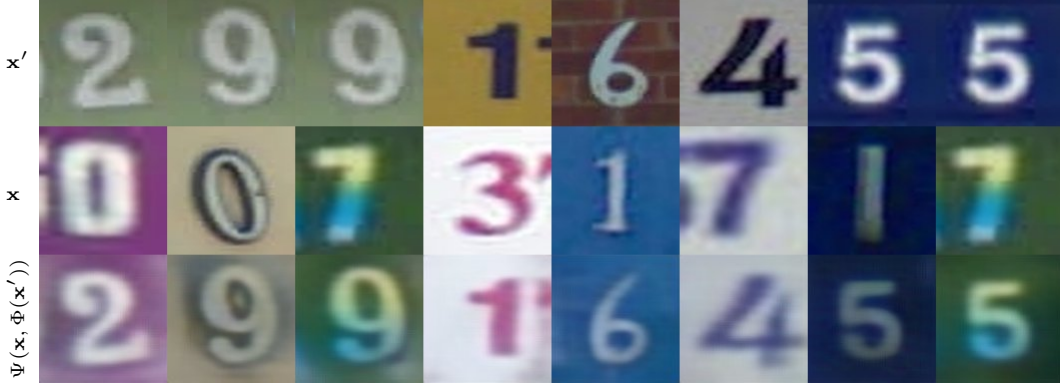

Figure 5: **SVHN digits**. Target, source, and generated image triplets  $\langle \mathbf{x}', \mathbf{x}, \Psi(\mathbf{x}, \Phi(\mathbf{x}')) \rangle$  from the SVHN test set. The digit shape is swapped out, while colours, shadows, and blur are retained.

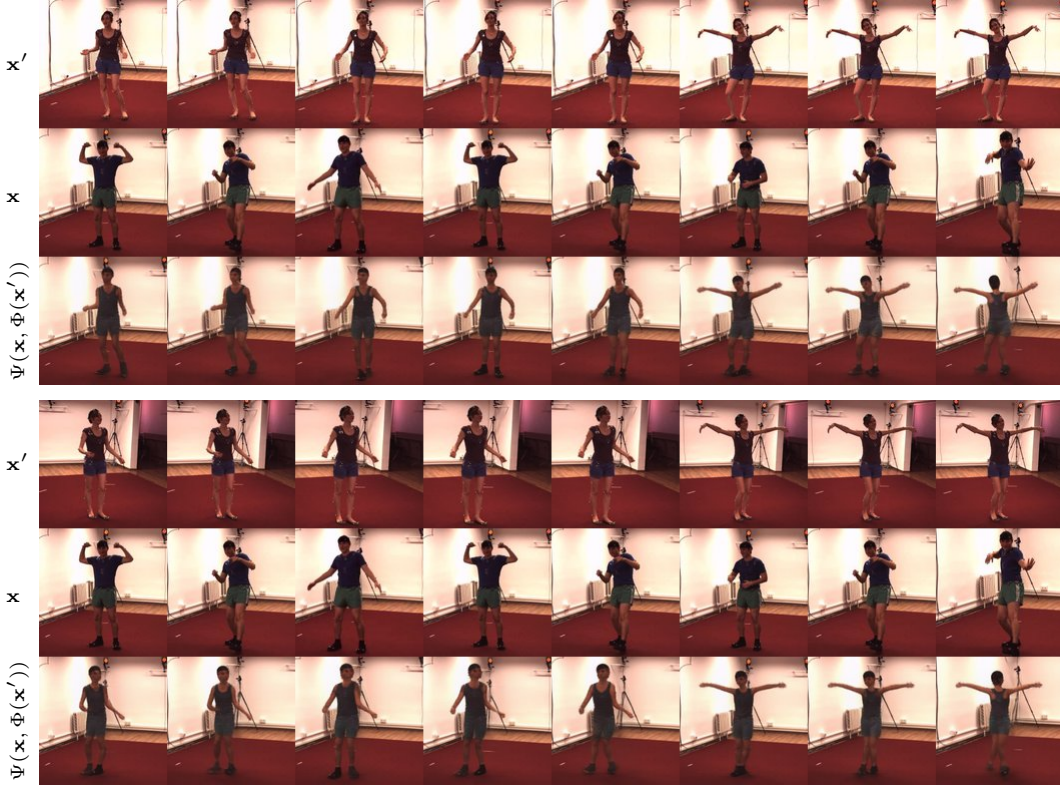

Figure 6: **Human3.6M humans**. Transfer across actors and viewpoints. **[top]**: different actors in various poses, imaged from the same viewpoint; the pose is swapped out, while appearance characteristics like shoes, clothing colour, and hat are retained. **[bottom]**: successful transfer even when the target is imaged from a different viewpoint (same poses as above).



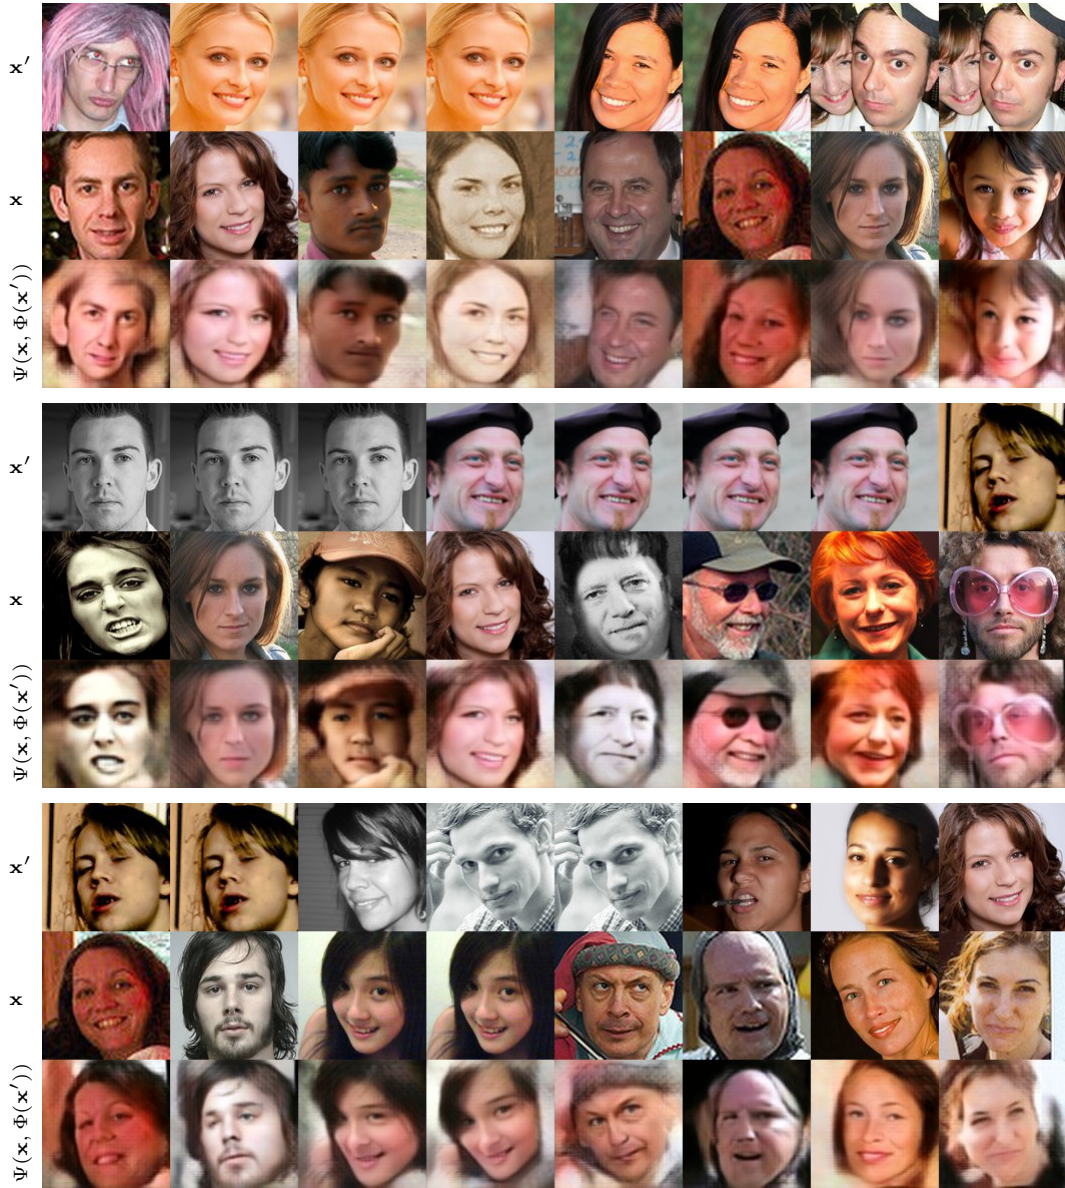

Figure 7: **AFLW Faces**. The source image  $x$  is rendered with the pose from the target image  $x'$ ; the identity is retained.

## References

- [1] Ziwei Liu, Ping Luo, Xiaogang Wang, and Xiaoou Tang. Deep learning face attributes in the wild. In *Proc. ICCV*, 2015.
- [2] A. Nagrani, J. S. Chung, and A. Zisserman. Voxceleb: a large-scale speaker identification dataset. In *INTERSPEECH*, 2017.
- [3] J. Thewlis, H. Bilen, and A. Vedaldi. Unsupervised learning of object landmarks by factorized spatial embeddings. In *Proc. ICCV*, 2017.
- [4] Zhanpeng Zhang, Ping Luo, Chen Change Loy, and Xiaoou Tang. Learning Deep Representation for Face Alignment with Auxiliary Attributes. *PAMI*, 2016.
